# Supplementary material
Source: Springer Nature journal article supplement (https://www.springermedizin.de/resource/supplementary/12888_2013_1628_MOESM1_ESM.pdf/9481038)
Supplement: MOESM1 [file 9481038]

**Identification**

Number of references identified through database search – **86**

Number of additional references identified through other sources – **17**

**Screening**

Number of duplicates removed through reading titles of abstracts – **9**

Number of abstracts screened – **94**

Number of references excluded – **4** involved a sample of individuals with Autistic Spectrum Disorders; **21** Tourette's Syndrome; **1** effects of cerebral malaria; **3** individuals with developmental disabilities; **1** individuals with epilepsy; **1** individuals with mental retardation; **1** with Smith-Lemli-Opitz syndrome; **1** with Myotonic Dystrophy; **2** with Down Syndrome; **1** bulimia nervosa; **1** with intellectual disabilities; **1** with post-traumatic stress disorder; **1** with Smith-Magenis Syndrome and **40** were not relevant to the focus of the present review.

**Eligibility**

Number of full text articles assessed for eligibility - **15**

Number of full text articles excluded - **0**

**Included**

Number of papers eligible – **15**

Number of papers unobtainable – **0**

Number of studies included in the qualitative synthesis – **15**
